# Supplementary material for: Harnessing Paenarthrobacter ureafaciens YL1 and Pseudomonas koreensis YL2 Interactions to Improve Degradation of Sulfamethoxazole
Source: MDPI journal article supplement (doi:10.3390/microorganisms10030648), 2022-03-18
Supplement: s1 [file s1]

## Supplementary material

**-Journal name:** *Microorganisms*

**-Manuscript Title:** Harnessing *Paenarthrobacter ureafaciens* YL1 and *Pseudomonas koreensis* YL2 interactions to improve degradation of sulfamethoxazole

**-The name(s) of the author(s):** Lan Yu<sup>1</sup>, Yingning Wang<sup>1</sup>, Xiaoqing Shan<sup>1</sup>, Fang Ma<sup>1,\*</sup>, Haijuan Guo<sup>2,\*</sup>

**-The affiliation(s) and address(es) of the author(s):**

<sup>1</sup> State Key Laboratory of Urban Water Resource and Environment, School of Environment, Harbin Institute of Technology, Harbin 150090, China

<sup>2</sup> College of Energy and Environmental Engineering, Hebei University of Engineering, Handan 056038, China

**-The e-mail address of the corresponding author**

\*Corresponding author. E-mail: mafang@hit.edu.cn; guohaijuan@163.com

**Table S1** The CARD analysis<sup>53</sup> of the strain YL2: the Resistance Gene Identifier (RGI) for perfect and strict hits to known resistance genes.

| RGI<br>Criteria | ARO Term                           | Detection Criteria       | AMR Gene Family                                                                                 | Drug class                                                                                                    | Resistance<br>Mechanism                               | % Identity of<br>Matching<br>Region | % Length of<br>Reference<br>Sequence |
|-----------------|------------------------------------|--------------------------|-------------------------------------------------------------------------------------------------|---------------------------------------------------------------------------------------------------------------|-------------------------------------------------------|-------------------------------------|--------------------------------------|
| Strict          | adeF                               | protein homolog<br>model | resistance-nodulation-cell division<br>(RND) antibiotic efflux pump                             | fluoroquinolone antibiotic,<br>tetracycline antibiotic                                                        | antibiotic efflux                                     | 66.6                                | 100.28                               |
| Strict          | adeF                               | protein homolog<br>model | resistance-nodulation-cell division<br>(RND) antibiotic efflux pump                             | fluoroquinolone antibiotic,<br>tetracycline antibiotic                                                        | antibiotic efflux                                     | 43.1                                | 97.45                                |
| Strict          | FosA                               | protein homolog<br>model | fosfomycin thiol transferase                                                                    | fosfomycin                                                                                                    | antibiotic<br>inactivation                            | 69.12                               | 102.22                               |
| Strict          | Pseudomonas<br>aeruginosa soxR     | protein homolog<br>model | ATP-binding cassette (ABC)<br>antibiotic efflux pump, major<br>facilitator superfamily (MFS)    | fluoroquinolone antibiotic,<br>cephalosporin, glycylcycline, penam,<br>tetracycline antibiotic, acridine dye, | antibiotic target<br>alteration, antibiotic<br>efflux | 68.79                               | 95.51                                |
|                 |                                    |                          | antibiotic efflux pump, resistance-<br>nodulation-cell division (RND)<br>antibiotic efflux pump | rifamycin antibiotic, phenicol<br>antibiotic, triclosan, disinfecting<br>agents and intercalating dyes        |                                                       |                                     |                                      |
| Strict          | Acinetobacter<br>baumannii<br>AbaQ | protein homolog<br>model | major facilitator superfamily (MFS)<br>antibiotic efflux pump                                   | fluoroquinolone antibiotic                                                                                    | antibiotic efflux                                     | 72.81                               | 101.38                               |
